# Supplementary material for: Transoceanic origin of microendemic and flightless New Caledonian weevils
Source: PubMed Central journal article supplement (PMC5493895; doi:10.1098/rsos.160546), 2017-06-07

## **Supplementary Information**

### Oceanic Origin of Microendemic and Flightless New Caledonian Weevils

Appendix 1. Taxon sampling

Appendix 2. Table of primers and PCR protocols

Appendix 3. Dispersal matrices used in the BioGeoBEARS analyses

Appendix 4. BEAST chronogram with median ages and 95% height posterior distributions

Appendix 5. Results of the different BioGeoBEARS analyses. The regions used in the

analyses are as follow: A, Australia (red); B, Borneo (pink); C, New Caledonia (light blue);

G, New Guinea (dark blue); J, Java (yellowish green); L, Lesser Sunda islands (green);

M, Moluccas (blueish green); S, Sumatra (orange); and W, Sulawesi (purple).

Appendix 6. Detailed result of the DIVALIKE+j analysis conducted in BioGeoBEARS

| Specimen-Code | Genus                  | Species                      | Authority   | Area                 | Locality                                                                 | Life-Style | PaJerry  | ArgK     | HA       | EF1a     | 16S       | 16S      | CAD 3    | EN       |
|---------------|------------------------|------------------------------|-------------|----------------------|--------------------------------------------------------------------------|------------|----------|----------|----------|----------|-----------|----------|----------|----------|
| ARC0254       | Trigonopterus          | vulcanicus                   | Riedel      | Java                 | W-Java, Telaga Warna, between Puncak and Cipanas                         | edaphic    | HG939629 | HG939762 | HG940108 | HG939982 | HG940281  | HG940207 | HG939910 | HG940041 |
| ARC0263       | Trigonopterus          | misellus                     | Riedel      | Sumatra              | E-Sumatra, Lampung, Pedada Bay, Bawang, Gn. Tanggang                     | edaphic    | LN885002 |          |          | LN884669 |           |          | LN880351 | LN884746 |
| ARC0281       | Trigonopterus          | singularis                   | Marshall    | Sumatra              | E-Sumatra, Lampung, Kalianda, Gn. Rajabasa                               | edaphic    | LN885005 | LN884584 |          | LN884671 |           | LN884325 | LN880355 | LN884749 |
| ARC0296       | Trigonopterus          | javensis                     | Riedel      | Java                 | C-Java, Petungkriyono, N slopes of Dieng plateau, Mountain N of Tinalum  | edaphic    | LN885007 | LN884585 | LN884850 | LN884674 |           |          | LN880357 | LN884751 |
| ARC0323       | Trigonopterus          | sp. 427                      |             | Sulawesi             | N-Sulawesi, Bitung, Gn. Dua Saudara                                      | edaphic    |          |          | LN884853 | LN884677 |           | LN884422 | LN884328 |          |
| ARC0391       | Trigonopterus          | nasutus                      | (Pascoe)    | New Guinea           | W-Papua, Manokwari Prov., Manokwari, Gn. Meja                            | foliage    | LT603147 | LT603221 | LT603302 | LT603351 |           | LT603465 | LT603550 | LT603627 |
| ARC0422       | Trigonopterus          | lineellus                    | Riedel      | New Guinea           | W-Papua, Jayapura Reg., Sentani, Cyclops Mts.                            | foliage    |          |          | HG940112 | HG939984 | HG940286  | HG940211 | HG939915 | HG940046 |
| ARC0426       | Trigonopterus          | eremitus                     | Riedel      | New Guinea           | W-Papua, Jayapura Reg., Sentani, Cyclops Mts.                            | foliage    | HG939634 | HG939765 | HG940113 | HG939985 | HG940287  | HG940212 | HG939916 | HG940047 |
| ARC0429       | Trigonopterus          | tibialis                     | Riedel      | New Guinea           | W-Papua, Jayapura Reg., Sentani, Cyclops Mts.                            | foliage    | HG939635 | HG939766 | HG940114 |          | HG940288  | HG940213 | HG939917 | HG940048 |
| ARC0444       | Trigonopterus          | augur                        | Riedel      | New Guinea           | W-Papua, Jayapura Reg., Sentani, Cyclops Mts.                            | foliage    |          |          |          |          | LT603222  | LT603466 | LT603628 |          |
| ARC0460       | Trigonopterus          | vandekampi                   | Riedel      | New Guinea           | W-Papua, Jayapura Reg., Sentani, Cyclops Mts.                            | foliage    | HG939636 | HG939767 |          | HG939986 | HG940289  | HG940214 | HG939918 | HG940049 |
| ARC0475       | Trigonopterus          | ferrugineus                  | Riedel      | New Guinea           | W-Papua, Jayapura Reg., Sentani, Cyclops Mts.                            | foliage    | HG939637 | HG939768 |          | HG939987 | HG940290  | HG940215 | HG939919 | HG940050 |
| ARC0492       | Trigonopterus          | pseudonasutus                | Riedel      | New Guinea           | W-Papua, Jayapura Reg., Sentani, Cyclops Mts.                            | foliage    | HG939638 | HG939769 | HG940115 | HG939988 | HG940291  | HG940216 | HG939920 | HG940051 |
| ARC0508       | Trigonopterus          | sulcatus                     | Riedel      | New Guinea           | W-Papua, Jayapura Reg., Sentani, Cyclops Mts.                            | edaphic    | HG939639 | HG939770 | HG940116 | HG939989 | HG940292  |          | HG939921 | HG940052 |
| ARC0513       | Trigonopterus          | simulans                     | Riedel      | New Guinea           | W-Papua, Jayapura Reg., Sentani, Cyclops Mts.                            | edaphic    | LT603148 | LT603223 |          | LT603352 |           | LT603467 | LT603551 |          |
| ARC0516       | Trigonopterus          | zygops                       | Riedel      | New Guinea           | W-Papua, Jayapura Reg., Sentani, Cyclops Mts.                            | edaphic    | HG939640 | HG939771 | HG940117 | HG939990 | HG940293  | HG940217 | HG939922 | HG940053 |
| ARC0519       | Trigonopterus          | lineatus                     | Riedel      | New Guinea           | W-Papua, Jayapura Reg., Sentani, Cyclops Mts.                            | edaphic    |          | HG939772 | HG940118 | HG939991 | HG940294  | HG940218 | HG939923 | HG940054 |
| ARC0530       | Trigonopterus          | areopendrii                  | Riedel      | New Guinea           | W-Papua, Jayapura Reg., Sentani, Cyclops Mts.                            | edaphic    | HG939641 |          |          | HG939992 | HG940295  | HG940219 | HG939924 | HG940055 |
| ARC0534       | Trigonopterus          | dromedarius                  | Riedel      | New Guinea           | W-Papua, Jayapura Reg., Sentani, Cyclops Mts.                            | edaphic    |          | HG939773 |          | HG939993 | HG940296  | HG940220 | HG939925 | HG940056 |
| ARC0538       | Trigonopterus          | dentirostris                 | Riedel      | New Guinea           | W-Papua, Jayapura Reg., Sentani, Cyclops Mts.                            | edaphic    |          | HG939774 | HG940119 | HG939994 | HG940297  | HG940221 | HG939926 | HG940057 |
| ARC0562       | Trigonopterus          | rhinoceros                   | Riedel      | New Guinea           | W-Papua, Jayapura Reg., Sentani, Cyclops Mts.                            | edaphic    | HG939642 | HG939775 | HG940120 | HG939995 | HG940298  |          | HG939927 | HG940058 |
| ARC0606       | Trigonopterus          | tridentatus                  | Riedel      | New Guinea           | W-Papua, Manokwari, Gn. Meja                                             | edaphic    | HG939647 |          | HG940125 | HG939999 | HG940304  |          |          | HG940063 |
| ARC0633       | Trigonopterus          | subglabratus                 | Riedel      | New Guinea           | W-Papua, Jayapura Reg., Sentani, Cyclops Mts.                            | edaphic    | LT603149 |          | LT603303 | LT603353 |           | LT603468 |          |          |
| ARC0670       | Trigonopterus          | cf. illex                    | (Faust)     | New Guinea           | W-Papua, Jayapura Reg., Sentani, Cyclops Mts.                            | foliage    | HG939648 | HE613866 | HG940126 | HG940000 | HG940305  | HG940226 | HG939933 | HG940064 |
| ARC0678       | Trigonopterus          | scharfi                      | Riedel      | New Guinea           | W-Papua, Jayapura Reg., Sentani, Cyclops Mts.                            | edaphic    | HG939649 | HG939780 | HG940127 | HG940001 | HG940306  | HG940227 | HG939934 |          |
| ARC0695       | Trigonopterus          | sp. 31                       |             | New Guinea           | W-Papua, Jayapura Reg., Sentani, Cyclops Mts.                            | foliage    | HG939650 | HG939781 | HG940128 | HG940002 | HG940307  | HG940228 |          |          |
| ARC0735       | Trigonopterus          | kurulu                       | Riedel      | New Guinea           | W-Papua, Jayawijaya Reg., Jiwiki, Kurulu                                 | edaphic    | HG939653 | HG939783 |          | HG940005 | HG940310  | HG940230 | HG939936 | HG940065 |
| ARC0836       | Trigonopterus          | scissops                     | Riedel      | New Guinea           | W-Papua, Manokwari Reg., Arfak Mts., Mokwam, Siyoubrig                   | edaphic    | HG939654 | HG939784 | HG940130 | HG940006 | HG940311  | HG940231 | HG939937 | HG940066 |
| ARC0858       | Trigonopterus          | inflatus                     | Riedel      | New Guinea           | W-Papua, Biak Reg., Biak Island, Nernu                                   | edaphic    | HG939655 | HG939785 | HG940131 |          | HG940312  | HG940232 | HG939938 | HG940067 |
| ARC0914       | Critomerus             | iliacus                      | (Pascoe)    | New Guinea           | W-Papua, Jayapura Reg., Sentani, Cyclops Mts.                            | ambiguous  | HG939656 | HG939786 | HG940132 | HG940007 | HG940313  |          | HG939939 | LN884755 |
| ARC0934       | Trigonopterus          | cf. illitus                  | (Faust)     | New Guinea           | PNG, Central Prov., Varirata N.P.                                        | foliage    |          | LT603224 | LT603304 |          |           | LT603469 | LT603552 |          |
| ARC0967       | Trigonopterus          | sp. 150                      |             | New Guinea           | PNG, Central Prov., Moroka area, Kailaki, Mt. Berogoro                   | foliage    | HG939657 | HG939787 | HG940133 | HG940008 | HG940314  | HG940233 | HG939940 | HG940068 |
| ARC1045       | Trigonopterus          | sp. 98                       |             | New Guinea           | PNG, Central Prov., Moroka area, Kailaki, Beremutana ridge               | foliage    | LT603150 |          |          |          |           | LT603470 | LT603553 |          |
| ARC1057       | Trigonopterus          | tialeorum                    | Riedel      | New Guinea           | PNG, Eastern Highlands Prov., Goroka, Mt. Gahavisuka                     | foliage    | LT603151 | LT603225 |          |          |           | LT603471 | LT603554 |          |
| ARC1127       | Trigonopterus          | ovatus                       | Riedel      | New Guinea           | PNG, Simbu Prov., Karimui Dist., Haia, Supa                              | foliage    | LT603152 | LT603226 | LT603305 |          | LT603396  | LT603472 | LT603555 | LT603629 |
| ARC1137       | Trigonopterus          | apicalis                     | Riedel      | New Guinea           | PNG, Simbu Prov., Karimui Dist., Haia, Supa                              | foliage    | LT603153 | LT603227 |          |          |           | LT603473 | LT603556 | LT603630 |
| ARC1179       | Trigonopterus          | discoidalis                  | Riedel      | New Guinea           | PNG, Morobe Prov., Huon peninsula, Mindik                                | edaphic    | HG939658 | HG939788 | HG940134 |          | LN884423  | HG940234 | HG939941 | HG940069 |
| ARC1235       | Trigonopterus          | sp. 165                      |             | New Guinea           | PNG, Morobe Prov., Huon peninsula, mountain SW Pindiu                    | foliage    | HG939659 |          | HG940135 |          | LN8840315 | HG940235 |          |          |
| ARC1320       | Trigonopterus          | micros                       | Riedel      | New Guinea           | PNG, Morobe Prov., Huon peninsula, Sattelberg                            | edaphic    | HG939660 | HG939789 | HG940136 | HG940009 | HG940316  | HG940236 |          |          |
| ARC1386       | Acalles (Trichacalles) | longipilis                   | Voss        | New Guinea           | PNG, Morobe Prov., Huon peninsula, Sattelberg                            | edaphic    | LN889603 | LN888814 |          | LN889060 | LN888284  |          | LN888954 |          |
| ARC1391       | Microporopterus        | cf. setosus                  | Voss        | New Guinea           | PNG, Morobe Prov., Huon peninsula, Sattelberg                            | edaphic    | HG939661 | HG939790 | HG940137 | HG940010 | HG940317  | HG940237 | HG939942 |          |
| ARC1456       | Trigonopterus          | sp. 582, pr. suturaelevata   | Rheinheimer | New Caledonia        | New Caledonia, Cap Ndoua, site 2, berleseate                             | edaphic    | LT603154 |          | LT603306 |          |           | LT603474 |          |          |
| ARC1458       | Trigonopterus          | lombokensis                  | Riedel      | Lesser Sunda Islands | Lombok Isl., Tetebatu, Rinjani-trail from Orong Gerisak                  | edaphic    | HG939664 | HG939792 | HG940138 |          | HG940320  | HG940240 | HG939944 | HG940071 |
| ARC1462       | Trigonopterus          | aeneomicans                  | Riedel      | Lesser Sunda Islands | Lombok Isl., Tetebatu, Rinjani-trail from Orong Gerisak                  | edaphic    | HG939666 | HG939794 | HG940140 | HG940013 | HG940322  | HG940242 | HG939946 | HG940073 |
| ARC1513       | Trigonopterus          | allotopus                    | Riedel      | Lesser Sunda Islands | W-Sumbawa, Batu Dulang, Gn. Batu Pasak                                   | foliage    |          | HG939801 | HG940147 | HG940020 | HG940329  | HG940249 | HG939953 |          |
| ARC1529       | Trigonopterus          | saltator                     | Riedel      | Lesser Sunda Islands | W-Sumbawa, Batu Dulang, Gn. Batu Pasak                                   | edaphic    | HG939674 | HG939803 | HG940148 | HG940022 | HG940331  | HG940251 | HG939955 | HG940080 |
| ARC1585       | Trigonopterus          | caudatus                     | Heller      | New Caledonia        | New Caledonia, Bois du Sud                                               | foliage    | LT603155 | LT603228 | LT603307 |          |           | LT603475 | LT603557 |          |
| ARC1594       | Trigonopterus          | sp. 588                      |             | New Caledonia        | New Caledonia, Pic du Pin (base)                                         | foliage    | LT603156 | LT603229 | LT603308 | LT603354 | LT603398  | LT603476 | LT603558 | LT603631 |
| ARC1597       | Trigonopterus          | coriarius                    | Heller      | New Caledonia        | New Caledonia, Koghi Mts; roadside, ex <i>Hibbertia lucens</i>           | foliage    | LT603157 | LT603230 | LT603309 | LT603355 | LT603399  | LT603477 | LT603559 |          |
| ARC1601       | Trigonopterus          | sp. 603, pr. hassleri        | Rheinheimer | New Caledonia        | New Caledonia, Koghi Mts; forest entrance                                | foliage    | LT603158 | LT603231 | LT603310 |          |           | LT603478 | LT603560 | LT603632 |
| ARC1604       | Trigonopterus          | sp. 597, pr. hassleri        | Rheinheimer | New Caledonia        | New Caledonia, Dzumac Mts., road from jct to old mine                    | foliage    | LT603159 | LT603232 | LT603311 |          |           | LT603401 | LT603479 |          |
| ARC1605       | Trigonopterus          | sp. 628, pr. sculpturatus    | Rheinheimer | New Caledonia        | New Caledonia, Dzumac Mts., road from jct to old mine                    | foliage    | LT603160 | LT603233 | LT603312 | LT603356 |           | LT603402 | LT603480 | LT603561 |
| ARC1606       | Trigonopterus          | sp. 598, pr. setipoides      | Rheinheimer | New Caledonia        | New Caledonia, Dzumac Mts., Mt. Quin road jct, day beating               | foliage    | LT603161 | LT603234 |          |          |           | LT603403 | LT603481 | LT603562 |
| ARC1607       | Trigonopterus          | sp. 608                      |             | New Caledonia        | New Caledonia, Dzumac Mts., Mt. Quin road jct, day beating               | foliage    | LT603162 | LT603235 |          |          |           | LT603404 | LT603482 | LT603563 |
| ARC1608       | Trigonopterus          | sp. 599, pr. setipoides      | Rheinheimer | New Caledonia        | New Caledonia, Dzumac Mts., Mt. Quin road jct, day beating               | foliage    |          | LT603236 |          | LT603357 | LT603405  | LT603483 | LT603564 | LT603634 |
| ARC1612       | Trigonopterus          | sp. 600, pr. pilosipes       | Rheinheimer | New Caledonia        | New Caledonia, Dzumac road, forest, night beating roadside               | foliage    | LT603163 | LT603237 | LT603313 |          |           | LT603406 | LT603484 | LT603565 |
| ARC1615       | Trigonopterus          | biguttatus ?                 | Rheinheimer | New Caledonia        | New Caledonia, Pic Ningua, roadside vegetation                           | foliage    | LT603164 | LT603238 |          | LT603358 | LT603407  | LT603485 | LT603566 | LT603635 |
| ARC1617       | Trigonopterus          | sp. 605-B, pr. hassleri      | Rheinheimer | New Caledonia        | New Caledonia, Mt. Do, roadside, night beating                           | foliage    | LT603165 | LT603239 |          |          | LT603408  | LT603486 | LT603567 | LT603636 |
| ARC1621       | Trigonopterus          | sp. 605-A, pr. hassleri      | Rheinheimer | New Caledonia        | New Caledonia, Humboldt, S track                                         | foliage    | LT603166 | LT603240 |          |          | LT603359  | LT603409 | LT603487 | LT603568 |
| ARC1623       | Trigonopterus          | sp. 616, pr. rufipterus      | Rheinheimer | New Caledonia        | New Caledonia, Humboldt, S track, botanical reserve, moss forest         | foliage    | LT603167 | LT603241 | LT603314 |          | LT603360  | LT603410 | LT603488 | LT603569 |
| ARC1625       | Trigonopterus          | sp. 622, pr. diversicollis   | Heller      | New Caledonia        | New Caledonia, Humboldt, S track, botanical reserve, moss forest         | foliage    | LT603168 | LT603242 |          |          | LT603361  | LT603411 | LT603489 | LT603570 |
| ARC1626       | Trigonopterus          | sp. 595                      |             | New Caledonia        | New Caledonia, Humboldt, S track, maquis, beating down to Col du Vulcain | foliage    | LT603169 | LT603243 |          | LT603315 |           | LT603412 | LT603490 | LT603571 |
| ARC1630       | Trigonopterus          | sp. 618, pr. sexmaculatus    | Rheinheimer | New Caledonia        | New Caledonia, Col d'Amieu (3.0 km to gate)                              | foliage    | LT603170 | LT603244 | LT603316 | LT603362 |           | LT603413 | LT603491 | LT603572 |
| ARC1636       | Trigonopterus          | hassleri ?                   | Rheinheimer | New Caledonia        | New Caledonia, Col d'Amieu (3.0 km to gate)                              | foliage    | LT603171 | LT603245 | LT603317 |          |           | LT603414 | LT603492 | LT603573 |
| ARC1638       | Trigonopterus          | sp. 619                      |             | New Caledonia        | New Caledonia, Col d'Amieu (3.0 km to gate)                              | foliage    | LT603172 | LT603246 |          |          |           | LT603415 | LT603493 | LT603574 |
| ARC1641       | Trigonopterus          | sp. 586                      |             | New Caledonia        | New Caledonia, Mandjéla                                                  | foliage    | LT603173 | LT603247 |          |          | LT603363  | LT603416 | LT603494 | LT603575 |
| ARC1643       | Trigonopterus          | sp. 624, pr. insignoides     | Rheinheimer | New Caledonia        | New Caledonia, Mandjéla                                                  | foliage    | LT603174 | LT603248 | LT603318 |          |           | LT603417 | LT603495 | LT603576 |
| ARC1645       | Trigonopterus          | sp. 590, similar to caudatus | Heller      | New Caledonia        | New Caledonia, Mandjéla, track -> pic 1 km NW summit                     | foliage    | LT603175 | LT603249 | LT603319 |          |           | LT603418 | LT603496 | LT603577 |
| ARC1646       | Trigonopterus          | rufithorax                   | Rheinheimer | New Caledonia        | New Caledonia, Mandjéla, track -> pic 1 km NW summit                     | foliage    |          | LT603250 |          |          | LT603364  | LT603419 | LT603497 | LT603578 |
| ARC1651       | Trigonopterus          | sp. 629, pr. coriarius       | Heller      | New Caledonia        | New Caledonia, Pic d'Amoa (Povila), road end                             | foliage    | LT603176 | LT603251 |          |          |           | LT603420 | LT603498 | LT603579 |
| ARC1653       | Trigonopterus          | sp. 612                      |             |                      |                                                                          |            |          |          |          |          |           |          |          |          |

|         |                |                              |             |                      |                                                                              |           |          |          |          |          |          |          |          |          |
|---------|----------------|------------------------------|-------------|----------------------|------------------------------------------------------------------------------|-----------|----------|----------|----------|----------|----------|----------|----------|----------|
| ARC1661 | Trigonopterus  | rufipterus                   | Rheinheimer | New Caledonia        | New Caledonia, 8 km SSE Poro, plateau above mine, ex <i>Hibbertia lucens</i> | foliage   | LT603182 | LT603258 |          | LT603367 | LT603427 | LT603505 | LT603586 | LT603647 |
| ARC1663 | Trigonopterus  | sp. 582, pr. suturaelevata   | Rheinheimer | New Caledonia        | New Caledonia, Forêt Nord, rainforest, sifting                               | edaphic   | LT603183 | LT603259 | LT603321 | LT603368 | LT603428 | LT603506 | LT603587 | LT603648 |
| ARC1666 | Trigonopterus  | kuscheli                     | Rheinheimer | New Caledonia        | New Caledonia, Col de Yate, highest point, maquis                            | foliage   | LT603184 | LT603260 | LT603322 | LT603369 | LT603429 | LT603507 | LT603588 | LT603649 |
| ARC1670 | Trigonopterus  | caudatus                     | Heller      | New Caledonia        | New Caledonia, Col des Deux Têtons                                           | foliage   | LT603185 | LT603261 | LT603323 |          | LT603430 | LT603508 | LT603589 | LT603650 |
| ARC1675 | Ouroporopterus | squamiventris                | Lea         | Australia            | Queensland, Lamington N.P., IBISCA 700A, Malaise, RF                         | ambiguous | HG939677 | HG939806 | HG940151 |          | HG940334 | HG940254 | HG939586 |          |
| ARC1707 | Trigonopterus  | sp. 93                       |             | New Guinea           | W-Papua, Jayawijaya Reg., Jiwika, Kurulu                                     | foliage   | HG939678 |          | HG940152 | HG940025 | HG940335 | HG940255 | HG939957 |          |
| ARC1722 | Trigonopterus  | sp. 70                       |             | New Guinea           | W-Papua, Jayawijaya Reg., Poga                                               | edaphic   | HG939679 |          |          |          | HG940336 | HG940256 | HG939958 | HG940083 |
| ARC1724 | Trigonopterus  | constrictus                  | Riedel      | New Guinea           | W-Papua, Jayawijaya Reg., Poga                                               | edaphic   | LT603186 | LT603262 | LT603324 | LT603370 |          | LT603509 |          |          |
| ARC1732 | Trigonopterus  | sp. 117                      |             | New Guinea           | W-Papua, Jayawijaya Reg., Poga                                               | edaphic   |          |          | HG940153 | HG940026 | HG940337 | HG940257 | HG939959 | HG940084 |
| ARC1790 | Trigonopterus  | durus                        | Riedel      | New Guinea           | W-Papua, Jayawijaya Reg., Bokondini                                          | foliage   | HG939680 |          | HG940154 | HG940026 | HG940338 | HG940258 | HG939960 | HG940085 |
| ARC1831 | Trigonopterus  | helios                       | Riedel      | New Guinea           | PNG, Eastern Highlands Prov., Okapa, Kimiagomo vilage, Afiyaleto             | foliage   | LT603187 | LT603263 | LT603325 |          |          | LT603510 |          |          |
| ARC1857 | Trigonopterus  | soiorum                      | Riedel      | New Guinea           | PNG, Eastern Highlands Prov., Aiюра                                          | foliage   | LT603188 | LT603264 |          |          |          | LT603511 |          |          |
| ARC1864 | Trigonopterus  | moreaorum                    | Riedel      | New Guinea           | PNG, Eastern Highlands Prov., Okapa, Kimiagomo vilage, Verefare              | foliage   | LT603189 | LT603265 | LT603326 | LT603371 |          | LT603512 | LT603590 | LT603651 |
| ARC2205 | Trigonopterus  | paraflorens                  | Riedel      | Lesser Sunda Islands | Flores Isl., Ruteng, Gn. Ranaka                                              | edaphic   |          | LN884594 | LN884861 | LN884685 |          | LN884335 | LN880367 | LN884764 |
| ARC2243 | Trigonopterus  | tiga                         | Riedel      | Lesser Sunda Islands | Flores Isl., Labuhan Bajo, Tebedo                                            | edaphic   | HG939687 | HG939813 | HG940160 |          | HG940346 | HG940266 | HG939968 | HG940093 |
| ARC2256 | Trigonopterus  | fulgidus                     | Riedel      | Lesser Sunda Islands | Lombok Isl., Gn. Rinjani, Senaru, Rinjani-track                              | edaphic   | HG939690 | HG939815 | HG940163 |          | HG940349 | HG940269 | HG939971 | HG940096 |
| ARC2314 | Trigonopterus  | telagensis                   | Riedel      | Lesser Sunda Islands | Bali Isl., Busungbiu – Pupuan, Telaga, Primate reserve                       | edaphic   | HG939691 | HG939817 | HG940165 |          | HG940351 | HG940271 | HG939973 | HG940098 |
| ARC2331 | Trigonopterus  | satu                         | Riedel      | Java                 | East Java, Banyuwangi Reg., Meru Betiri N.P., Sukamade                       | edaphic   |          | LN884597 | LN884863 |          |          | LN884338 | LN880370 | LN884767 |
| ARC2368 | Trigonopterus  | sp. 604, pr. hassleri        | Rheinheimer | New Caledonia        | New Caledonia, Col des Deux Têtons                                           | foliage   | LT603190 | LT603266 |          |          | LT603431 | LT603513 | LT603591 | LT603652 |
| ARC2371 | Trigonopterus  | diversicollis ?              | Heller      | New Caledonia        | New Caledonia, Col des Deux Têtons                                           | foliage   | LT603191 | LT603267 |          | LT603372 | LT603432 | LT603514 | LT603592 | LT603653 |
| ARC2377 | Trigonopterus  | pilosipes                    | Rheinheimer | New Caledonia        | New Caledonia, Pic du Pin (base)                                             | foliage   | LT603192 | LT603268 | LT603328 | LT603373 | LT603433 | LT603515 | LT603593 | LT603654 |
| ARC2381 | Trigonopterus  | sp. 593                      |             | New Caledonia        | New Caledonia, Pic du Grand Kaori                                            | foliage   | LT603193 | LT603269 |          | LT603374 | LT603434 | LT603516 | LT603594 | LT603655 |
| ARC2384 | Trigonopterus  | sp. 620                      |             | New Caledonia        | New Caledonia, Parc des Grandes Fougères, N of Pic Vincent                   | foliage   | LT603194 | LT603270 | LT603329 |          | LT603435 | LT603517 | LT603595 | LT603656 |
| ARC2386 | Trigonopterus  | sp. 607                      |             | New Caledonia        | New Caledonia, Parc des Grandes Fougères, N of Pic Vincent                   | foliage   | LT603195 | LT603271 | LT603330 |          | LT603436 | LT603518 | LT603596 | LT603657 |
| ARC2401 | Trigonopterus  | pseudoinsignis               | Rheinheimer | New Caledonia        | New Caledonia, Sarramea, trail to Dogny                                      | foliage   | LT603196 | LT603272 | LT603331 | LT603375 | LT603437 | LT603519 | LT603597 | LT603658 |
| ARC2402 | Trigonopterus  | sp. 621, pr. heteropunctatus | Rheinheimer | New Caledonia        | New Caledonia, Sarramea, trail to Dogny                                      | foliage   | LT603197 | LT603273 |          |          | LT603438 | LT603520 | LT603598 | LT603659 |
| ARC2405 | Trigonopterus  | lescheni                     | Rheinheimer | New Caledonia        | New Caledonia, Sarramea, trail to Dogny                                      | foliage   |          | LT603274 |          |          | LT603376 | LT603439 | LT603521 | LT603599 |
| ARC2408 | Trigonopterus  | sp. 609                      |             | New Caledonia        | New Caledonia, Sarramea, trail to Dogny                                      | foliage   | LT603198 | LT603275 | LT603332 | LT603377 | LT603440 | LT603522 | LT603600 | LT603660 |
| ARC2410 | Trigonopterus  | sp. 606                      |             | New Caledonia        | New Caledonia, Sarramea, trail to Dogny                                      | foliage   | LT603199 | LT603276 | LT603333 | LT603378 | LT603441 | LT603523 | LT603601 |          |
| ARC2412 | Trigonopterus  | coriarius ?                  | Heller      | New Caledonia        | New Caledonia, S Humboldt trail                                              | foliage   | LT603200 | LT603277 |          | LT603379 | LT603442 | LT603524 | LT603602 |          |
| ARC2415 | Trigonopterus  | sp. 627, pr. dichrous        | Montrouzier | New Caledonia        | New Caledonia, Pindai Peninsula, Sentier de la Laverie, sclerophyll forest   | foliage   |          | LT603278 | LT603334 | LT603380 | LT603443 | LT603525 | LT603603 | LT603661 |
| ARC2418 | Trigonopterus  | femoridens                   | Rheinheimer | New Caledonia        | New Caledonia, Pic d'Amoa, Povilla, rainforest                               | foliage   | LT603201 | LT603279 | LT603335 |          | LT603444 | LT603526 | LT603604 | LT603662 |
| ARC2421 | Trigonopterus  | parvus                       | Rheinheimer | New Caledonia        | New Caledonia, Pic d'Amoa, Povilla, rainforest                               | foliage   | LT603202 | LT603280 |          | LT603381 | LT603445 | LT603527 | LT603605 |          |
| ARC2426 | Trigonopterus  | sp. 625, pr. insignoides     | Rheinheimer | New Caledonia        | New Caledonia, Pic d'Amoa, Povilla, rainforest                               | foliage   | LT603203 | LT603281 | LT603336 |          | LT603446 | LT603528 | LT603606 |          |
| ARC2428 | Trigonopterus  | insignoides                  | Rheinheimer | New Caledonia        | New Caledonia, Pic d'Amoa, Povilla, rainforest                               | foliage   | LT603204 | LT603282 |          |          | LT603382 | LT603447 | LT603529 | LT603607 |
| ARC2430 | Trigonopterus  | sp. 623-B                    |             | New Caledonia        | New Caledonia, Pic d'Amoa, Povilla, rainforest                               | foliage   | LT603205 | LT603283 |          |          | LT603383 | LT603448 | LT603530 | LT603608 |
| ARC2434 | Trigonopterus  | suturaelevata                | Rheinheimer | New Caledonia        | New Caledonia, Sarramea, trail to Dogny, sifting litter nr. Wye riv. pass    | edaphic   | LT603206 | LT603284 |          | LT603384 | LT603449 | LT603531 | LT603609 | LT603664 |
| ARC2436 | Trigonopterus  | sp. 585                      |             | New Caledonia        | New Caledonia, Canala, 4 km S of Mia, rd end, river valley, rainforest       | foliage   | LT603207 | LT603285 |          | LT603385 | LT603450 | LT603532 | LT603610 |          |
| ARC2438 | Trigonopterus  | sp. 632, pr. coriarius       | Heller      | New Caledonia        | New Caledonia, Canala, 4 km S of Mia, rd end, river valley, rainforest       | foliage   | LT603208 | LT603286 | LT603337 | LT603386 | LT603451 | LT603533 | LT603611 |          |
| ARC2455 | Trigonopterus  | sp. 615, pr. insignoides     | Rheinheimer | New Caledonia        | New Caledonia, Col des Roussettes, rainforest E of river                     | foliage   |          | LT603287 | LT603338 |          | LT603452 | LT603534 | LT603612 | LT603665 |
| ARC2483 | Trigonopterus  | acuminatus                   | Riedel      | Java                 | E-Java, Gn. Wilis, Kediri, Besuki                                            | edaphic   | HG939694 | HG939820 | HG940167 | HG940036 | HG940354 |          |          | HG940101 |
| ARC2526 | Trigonopterus  | wallacei                     | Riedel      | Borneo               | Sarawak, Kuching, Mt. Santubong                                              | edaphic   |          | HG939822 | HG940169 | HG940038 |          | HG940356 | HG940275 | HG939977 |
| ARC2531 | Trigonopterus  | trigonopterus                | Riedel      | Borneo               | W-Kalimantan, Bengkayan, Suka-Bangun, Gn. Bawang                             | edaphic   | HG939696 | HG939823 | HG940170 |          | HG940357 | HG940276 | HG939978 | HG940103 |
| ARC2538 | Trigonopterus  | sepulchri                    | Riedel      | Borneo               | W-Kalimantan, Bengkayan, Suka-Bangun, Gn. Bawang                             | edaphic   | HG939697 | HG939824 | HG940171 |          | HG940358 | HG940277 | HG939979 | HG940104 |
| ARC2802 | Trigonopterus  | sp. 422                      |             | Sulawesi             | N-Sulawesi, Airmadidi, Gn. Klabat                                            | edaphic   | LT603209 | LT603288 | LT603339 |          |          | LT603535 | LT603613 | LT603666 |
| ARC2809 | Trigonopterus  | sp. 385                      |             | Sulawesi             | SE-Sulawesi, Wakatobi, Wangi Wangi Isl., Matahara                            | edaphic   | LT603210 | LT603289 | LT603340 | LT603387 |          | LT603536 | LT603614 | LT603667 |
| ARC2811 | Trigonopterus  | sp. 424                      |             | Sulawesi             | S-Sulawesi, Pc. Palopo, Gn. Sampuna                                          | foliage   | LT603211 | LT603290 | LT603341 |          |          | LT603537 | LT603615 | LT603668 |
| ARC2847 | Trigonopterus  | sp. 417                      |             | Sulawesi             | C-Sulawesi, Pendolo, Gn. Sampuraga                                           | foliage   |          | LN884619 |          |          |          | LN884362 | LN880392 | LN884789 |
| ARC2855 | Trigonopterus  | sp. 421                      |             | Sulawesi             | C-Sulawesi, Pendolo, Gn. Sampuraga                                           | foliage   | LN885032 | LN884621 | LN884886 | LN884703 | LN884426 | LN880394 | LN884790 |          |
| ARC2873 | Trigonopterus  | sp. 377                      |             | Sulawesi             | C-Sulawesi, Tentena, Taripa                                                  | foliage   | LN885035 | LN884624 | LN884887 | LN884706 | LN884428 | LN884367 | LN880397 | LN884791 |
| ARC2970 | Trigonopterus  | sp. 456                      |             | Moluccas             | Ternate Isl., Marikurubu, Gn. Gamalama                                       | foliage   | LN885040 | LN884628 |          | LN884708 | LN884433 | LN884372 | LN880402 | LN884797 |
| ARC3106 | Trigonopterus  | sp. 506                      |             | Sulawesi             | C-Sulawesi, Pendolo, Boe                                                     | foliage   | LN885051 | LN884638 | LN884899 |          | LN884444 | LN884384 | LN880414 | LN884809 |
| ARC3131 | Trigonopterus  | sp. 492                      |             | Sulawesi             | C-Sulawesi, Pendolo, Gn. Sampuraga                                           | foliage   | LN885053 | LN884901 | LN884718 | LN884446 | LN884446 | LN884386 |          | LN884811 |
| ARC3132 | Trigonopterus  | sp. 495                      |             | Sulawesi             | C-Sulawesi, Pendolo, Boe                                                     | edaphic   | LN885054 | LN884639 | LN884902 | LN884719 | LN884447 | LN884387 | LN880416 | LN884812 |
| ARC3146 | Trigonopterus  | sp. 489                      |             | Sulawesi             | SE-Sulawesi, Kendari, Road from Wawotobi to Lasolo                           | edaphic   | LN885058 |          | LN884905 |          | LN884451 | LN884391 | LN880420 | LN884816 |
| ARC3150 | Trigonopterus  | sp. 504                      |             | Sulawesi             | SE-Sulawesi, Kendari, Road from Wawotobi to Lasolo                           | foliage   | LN885059 | LN884642 |          |          | LN884452 | LN884392 | LN880421 | LN884817 |
| ARC3185 | Trigonopterus  | sp. 467                      |             | Sulawesi             | Selayar Isl., Pagarangan                                                     | edaphic   | LT603212 | LT603291 | LT603342 | LT603388 | LT603453 | LT603538 | LT603616 |          |
| ARC3233 | Trigonopterus  | sp. 578                      |             | Sulawesi             | S-Sulawesi, Mangkutana                                                       | edaphic   | LN885069 | LN884650 | LN884913 | LN884727 | LN884463 | LN884402 | LN880432 | LN884826 |
| ARC3247 | Trigonopterus  | sp. 471                      |             | Sulawesi             | C-Sulawesi, Ampana, Tanjung Api                                              | edaphic   | LN885072 | LN884653 | LN884915 |          | LN884466 |          | LN880435 | LN884829 |
| ARC3274 | Trigonopterus  | sp. 466                      |             | Sulawesi             | C-Sulawesi, Luwuk, Salodi, Gn. Taluanjang                                    | edaphic   |          | LN884655 | LN884917 | LN884730 | LN884468 | LN884405 | LN880437 |          |
| ARC3299 | Trigonopterus  | sp. 453                      |             | Moluccas             | Halmahera Isl., Kobe, Weda                                                   | edaphic   | LN885076 | LN884656 |          |          | LN884471 | LN884408 | LN880440 | LN884832 |
| ARC3303 | Trigonopterus  | sp. 451                      |             | Moluccas             | Halmahera Isl., Kobe, Weda                                                   | edaphic   | LN885078 |          |          | LN884921 | LN884473 | LN884411 | LN880443 | LN884834 |
| ARC3307 | Trigonopterus  | sp. 468                      |             | Moluccas             | Halmahera Isl., Weda, road to Sofifi                                         | edaphic   |          |          |          |          | LN884474 | LN884411 | LN880443 |          |
| ARC3340 | Trigonopterus  | sp. 454                      |             | Moluccas             | Halmahera Isl., Buli                                                         | edaphic   | LT603213 |          |          | LT603389 | LT603454 | LT603539 | LT603617 |          |
| ARC3353 | Trigonopterus  | sp. 465                      |             | Moluccas             | Halmahera Isl., Buli                                                         | edaphic   |          | LT603292 | LT603343 |          | LT603455 | LT603540 | LT603618 | LT603669 |
| ARC3362 | Trigonopterus  | sp. 447                      |             | Moluccas             | Halmahera Isl., Buli, road to Subaim                                         | edaphic   | LT603214 |          | LT603344 |          | LT603456 | LT603541 | LT603619 | LT603670 |
| ARC3388 | Trigonopterus  | sp. 544                      |             | Moluccas             | Halmahera Isl., Jailolo, Payo, Gn. Jailolo                                   | foliage   |          | LT603293 | LN884927 | LN884736 | LN884480 | LN884417 | LN880447 | LN884837 |
| ARC3588 | Trigonopterus  | tepalensis                   | Riedel      | Lesser Sunda Islands | W-Sumbawa, Tepal, Pc. Nengas                                                 | edaphic   | LN885083 | LN884661 | LN884928 | LN884737 |          | LN884418 |          | LN884838 |
| ARC3662 | Trigonopterus  | sp. 571                      |             | Australia            | Queensland, Brisbane, St. Lucia                                              | foliage   | LT603215 | LT603294 | LT603345 | LT603390 | LT603457 | LT603542 | LT603620 | LT603671 |
| ARC3663 | Trigonopterus  | sp. 550                      |             | Australia            | Queensland, North Stradbroke Isl., 3,5 km SW Point Lookout, Fishermans Road  | foliage   |          | LT603295 | LT603346 |          | LT603458 | LT603543 |          | LT603672 |
| ARC3681 | Trigonopterus  | sculptirostris               | Lea         | Australia            | Queensland, Mission Beach, Clump Mt. N.P., Bicton Hill                       | foliage   | LT603216 | LT603296 | LT603347 | LT603391 | LT603459 | LT603544 | LT603621 |          |
| ARC3692 | Trigonopterus  | laetus                       | Lea         | Australia            | Queensland, Mt. Cook N.P., Cooktown                                          | foliage   | LT603217 | LT603297 | LT603348 |          | LT603460 | LT603545 | LT603622 | LT603673 |
| ARC3695 | Trigonopterus  | albidosparsus                | Lea         | Australia            | Queensland, Mt. Cook N.P., Cooktown                                          | foliage   |          | LT603298 | LT603349 | LT603392 | LT603461 | LT603546 | LT603623 | LT603674 |
| ARC3717 | Trigonopterus  | monteithi                    | Riedel      | Australia            | Queensland, Kuranda N.P., Saddle Mountain Road                               | edaphic   | LT603218 | LT603299 | LT603350 | LT603393 | LT603462 | LT603547 | LT603624 | LT603675 |
| ARC3732 | Trigonopterus  | garradungensis               | Riedel      | Australia            | Queensland, Garradunga, Polly Ck., N Innisfail, Hasenpusch property          | edaphic   | LT603219 | LT603300 |          |          | LT603463 | LT603548 | LT603625 | LT603676 |
| ARC3762 | Trigonopterus  | hartleyensis                 | Riedel      | Australia            | Queensland, Cedar Bay N.P., road between Rossville and Bloomfield            | edaphic   | LT603220 | LT603301 |          |          | LT603394 | LT603464 | LT603549 | LT603626 |

| Gene                           | Location      | Primer     | Direction                  | Sequence (5' -> 3')                                                  | PCR protocol                                                                                                           | References                                     |
|--------------------------------|---------------|------------|----------------------------|----------------------------------------------------------------------|------------------------------------------------------------------------------------------------------------------------|------------------------------------------------|
| Cytochrome c oxidase 1; 5' end | mitochondrial | LCO1490-JJ | FOR                        | CHACWAAAYCATAAAGATATYGG                                              | D:94°C for 30 sec; A:47(52)°C for 40 sec; E:72°C for 60 sec<br>5 cycles 47°C, 30 cycles 52°C                           | Astrin & Stüben, 2008<br>Astrin & Stüben, 2008 |
|                                |               | HCO2198-JJ | REV                        | AWACTTCVGGRTGVCCAAARAATCA                                            |                                                                                                                        |                                                |
| Cytochrome c oxidase 1; 3' end |               | Jerry      | FOR                        | CAACATTTATTTTGATTTTTTGG                                              | D:94°C for 30 sec; A:47(52)°C for 40 sec; E:72°C for 60 sec<br>5 cycles 47°C, 30 cycles 52°C                           | Simon et al., 1994<br>Simon et al., 1994       |
|                                |               | Pat        | REV                        | TCCAATGCACTAATCTGCCATATTA                                            |                                                                                                                        |                                                |
| 16S                            |               | 1472-JJ    | FOR                        | AGATAGAAACCRACCTGG                                                   | D:94°C for 30 sec; A:47(52)°C for 40 sec; E:72°C for 60 sec<br>5 cycles 47°C, 30 cycles 52°C                           | Astrin & Stüben, 2008<br>Astrin & Stüben, 2008 |
|                                |               | ar-JJ      | REV                        | CRCCTGTTTATTA AAAACAT                                                |                                                                                                                        |                                                |
| 18S                            | nuclear       | 18S 5'     | FOR                        | GACAACCTGGTTGATCCTGCCAGT                                             | D:94°C for 30 sec; A:47(52)°C for 40 sec; E:72°C for 60 sec<br>5 cycles 47°C, 30 cycles 52°C                           | Shull et al., 2001<br>Shull et al., 2001       |
|                                |               | 18S b5.0   | REV                        | TAACCGCAACAACCTTAAAT                                                 |                                                                                                                        |                                                |
| CAD3                           |               | CD821F     | FOR                        | AGCACGAAAATHGGNAGYTCNATGAARAG                                        | D:94°C for 30 sec; A:53°C for 30 sec; E:72°C for 60 sec<br>35 cycles                                                   | Wild & Maddison, 2008<br>Wild & Maddison, 2008 |
|                                |               | CD1098R2   | REV                        | GCTATGTTGTTNGGNAGYTGDCNCCCAT                                         |                                                                                                                        |                                                |
| Enolase                        |               | EN37F      | FOR                        | GACTCTCGTGGNAAYCCNACNGTNGAGGT                                        | D:94°C for 30 sec; A:53°C for 30 sec; E:72°C for 60 sec<br>35 cycles                                                   | Wild & Maddison, 2008<br>Wild & Maddison, 2008 |
|                                |               | EN731R     | REV                        | CTTGTAAGACTCNGANGCNGCNACRTCCAT                                       |                                                                                                                        |                                                |
| Arginine kinase                |               | AK183F     | FOR                        | GATTCTGGAGTCGGNATYTAYGCNCCYGAYGC                                     | D:94°C for 30 sec; A:53°C for 30 sec; E:72°C for 60 sec<br>35 cycles                                                   | Wild & Maddison, 2008<br>Wild & Maddison, 2008 |
|                                |               | AK939R     | REV                        | GCCNCCYTCRGCYTCRGTGTGYTC                                             |                                                                                                                        |                                                |
| Elongation factor 1 $\alpha$   |               | efs372     | FOR                        | CTGGTGAATTTGAAGCYGGTA                                                | D:94°C for 30 sec; A:58-42°C for 30 sec; E:72°C for 60 sec<br>$\Delta T$ -2°C every 3 cycles (58-44°C); 18 cycles 42°C | McKenna et al., 2005<br>Normark et al., 1999   |
|                                |               | efa754     | REV                        | CCACCAATTTGTAGACATC                                                  |                                                                                                                        |                                                |
| Histone 4                      | H4F2s         | FOR        | TSCGIGAYAACATYCAGGGIATCAC  | D:94°C for 30 sec; A:49°C for 30 sec; E:72°C for 60 sec<br>35 cycles | Pineau et al., 2004<br>Pineau et al., 2004                                                                             |                                                |
|                                | H4F2er        | REV        | CKYTTIAGIGCRTAIACCACRTCCAT |                                                                      |                                                                                                                        |                                                |

Appendix 3. Dispersal matrices used in the BioGeoBEARS analyses

| 30-15 | A    | B    | J    | L    | M    | C    | G    | W    | S    |
|-------|------|------|------|------|------|------|------|------|------|
| A     | 1    | 0.1  | 0.01 | 0.01 | 0.01 | 0.1  | 0.01 | 0.01 | 0.1  |
| B     | 0.1  | 1    | 0.01 | 0.01 | 0.01 | 0.1  | 0.01 | 0.01 | 1    |
| J     | 0.01 | 0.01 | 1    | 0.01 | 0.01 | 0.1  | 0.01 | 0.01 | 0.01 |
| L     | 0.01 | 0.01 | 0.01 | 1    | 0.01 | 0.1  | 0.01 | 0.01 | 0.01 |
| M     | 0.01 | 0.01 | 0.01 | 0.01 | 1    | 0.1  | 0.01 | 0.01 | 0.01 |
| C     | 0.1  | 0.1  | 0.1  | 0.1  | 0.1  | 1    | 0.01 | 0.01 | 0.1  |
| G     | 0.01 | 0.01 | 0.01 | 0.01 | 0.01 | 0.01 | 1    | 0.01 | 0.01 |
| W     | 0.01 | 0.01 | 0.01 | 0.01 | 0.01 | 0.01 | 0.01 | 1    | 0.01 |
| S     | 0.1  | 1    | 0.01 | 0.01 | 0.01 | 0.1  | 0.01 | 0.01 | 1    |

| 15-0 | A    | B    | J    | L   | M    | C   | G    | W   | S    |
|------|------|------|------|-----|------|-----|------|-----|------|
| A    | 1    | 0.25 | 0.25 | 0.5 | 0.5  | 0.1 | 1    | 0.5 | 0.25 |
| B    | 0.25 | 1    | 1    | 0.5 | 0.5  | 0.1 | 0.25 | 0.5 | 1    |
| J    | 0.25 | 1    | 1    | 1   | 0.5  | 0.1 | 0.25 | 0.5 | 1    |
| L    | 0.5  | 0.5  | 1    | 1   | 0.5  | 0.1 | 0.5  | 1   | 0.5  |
| M    | 0.5  | 0.5  | 0.5  | 0.5 | 1    | 0.1 | 1    | 1   | 0.25 |
| C    | 0.1  | 0.1  | 0.1  | 0.1 | 0.1  | 1   | 0.1  | 0.1 | 0.1  |
| G    | 1    | 0.25 | 0.25 | 0.5 | 1    | 0.1 | 1    | 0.5 | 0.25 |
| W    | 0.5  | 0.5  | 0.5  | 1   | 1    | 0.1 | 0.5  | 1   | 0.5  |
| S    | 0.25 | 1    | 1    | 0.5 | 0.25 | 0.1 | 0.25 | 0.5 | 1    |











BioGeoBEARS stratified DIVALIKE+J  
ancstates: global optim, 3 areas max. d=0.0102; e=0; j=0.1396; LnL=-186.61

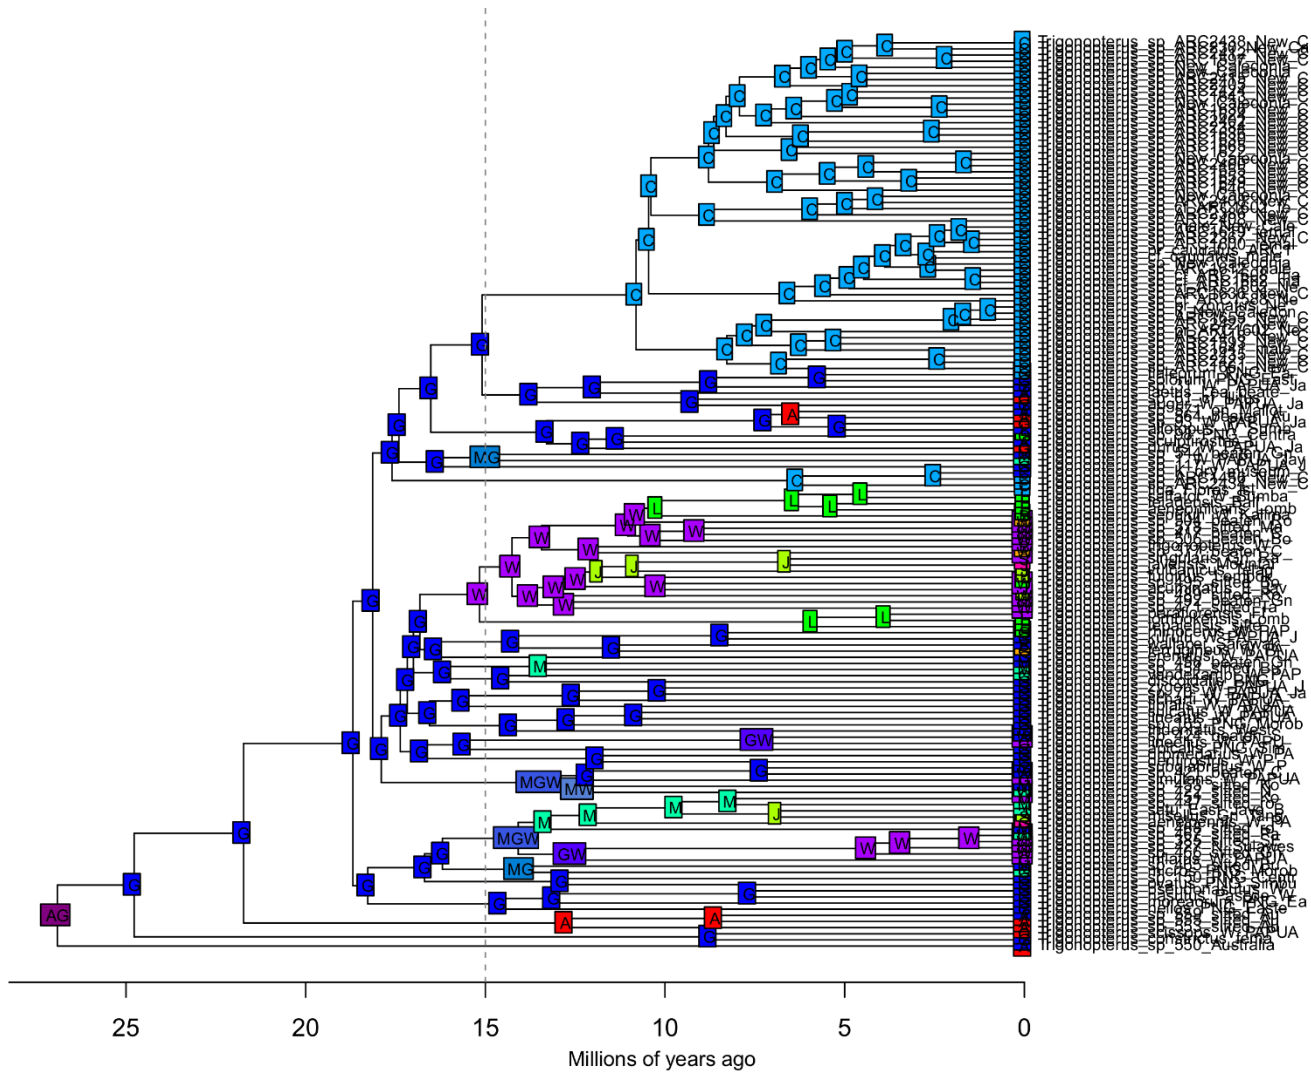

BioGeoBEARS stratified BAYAREALIKE  
ancstates: global optim, 3 areas max. d=0.0375; e=0.0351; j=0; LnL=-238.91

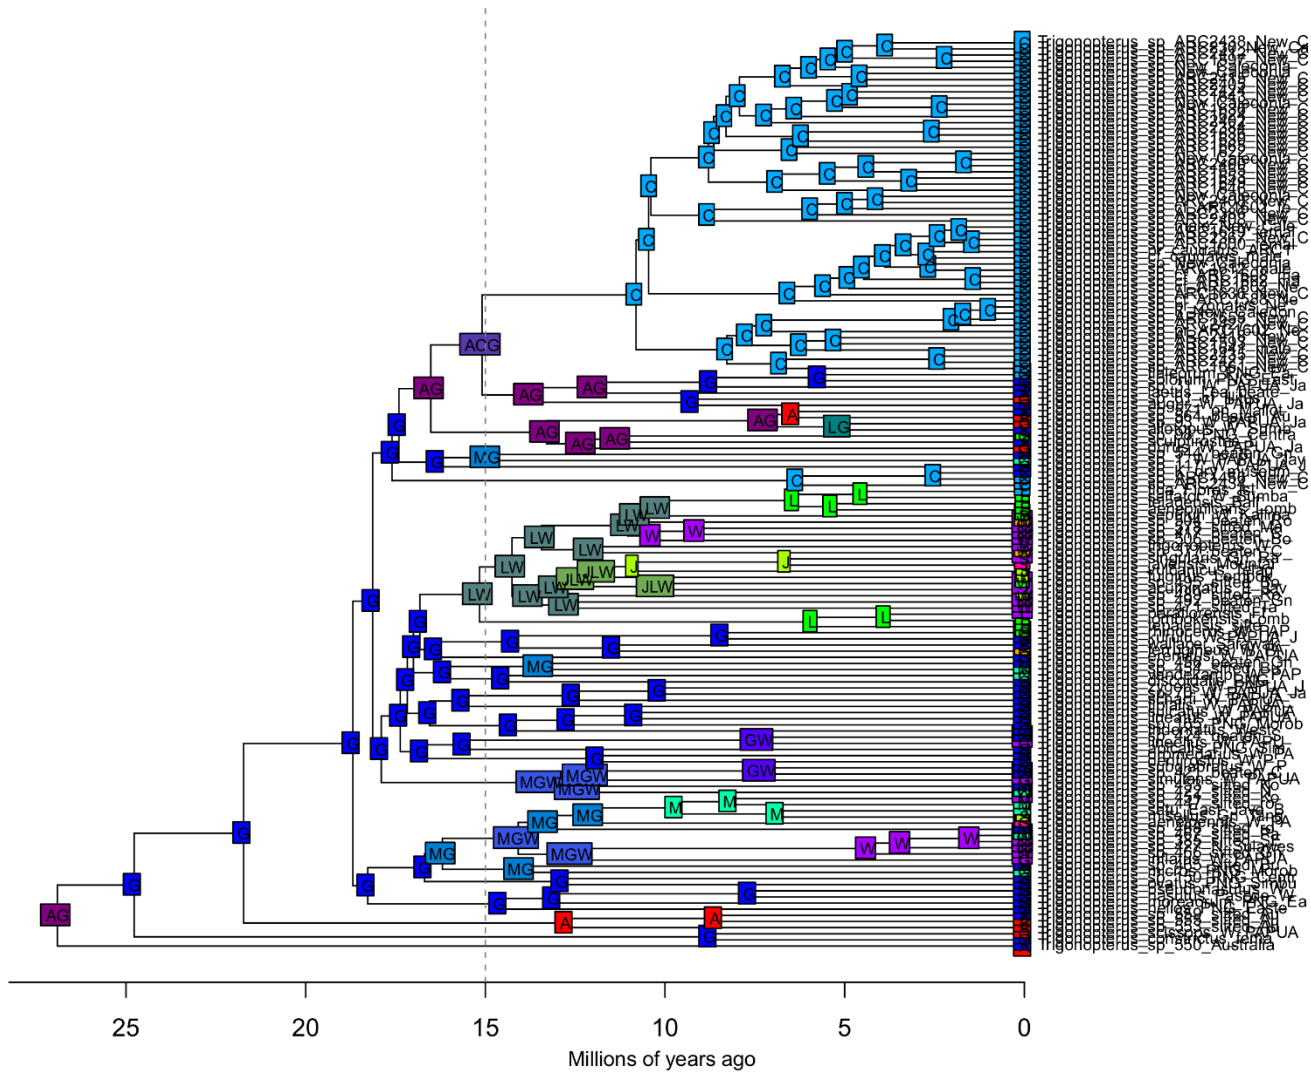

BioGeoBEARS stratified BAYAREALIKE+J  
ancstates: global optim, 3 areas max. d=0.001; e=0.001; j=0.1883; LnL=-192.44

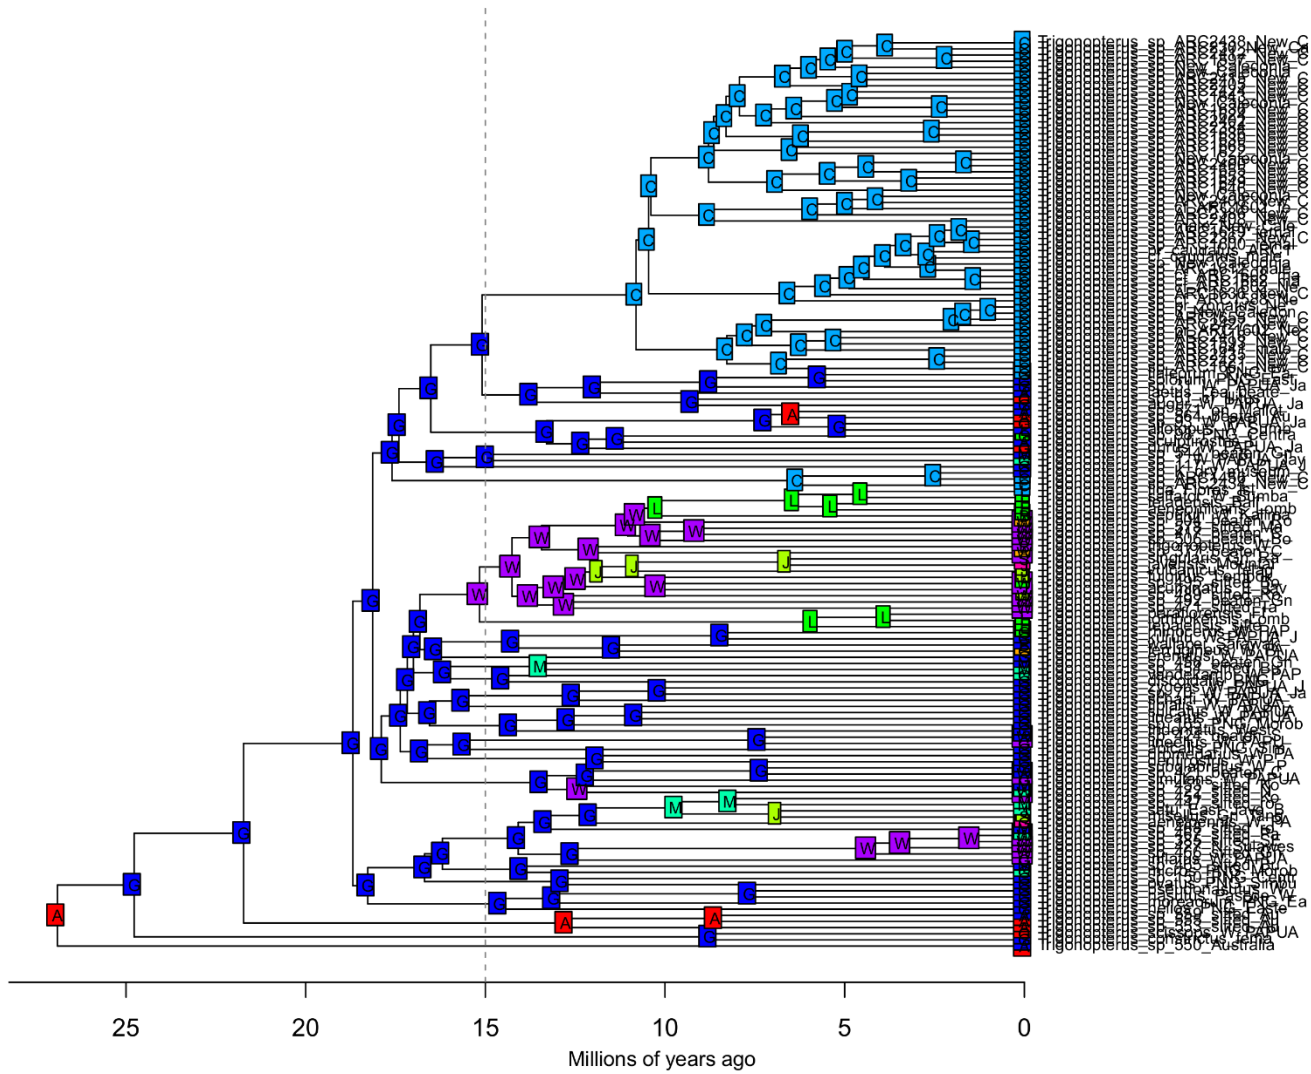

Appendix 6. Detailed result of the DIVALIKE+j analysis conducted in BioGeoBEARS

BioGeoBEARS stratified DIVALIKE+J  
ancstates: global optim, 3 areas max. d=0.0102; e=0; j=0.1396; LnL=-186.61

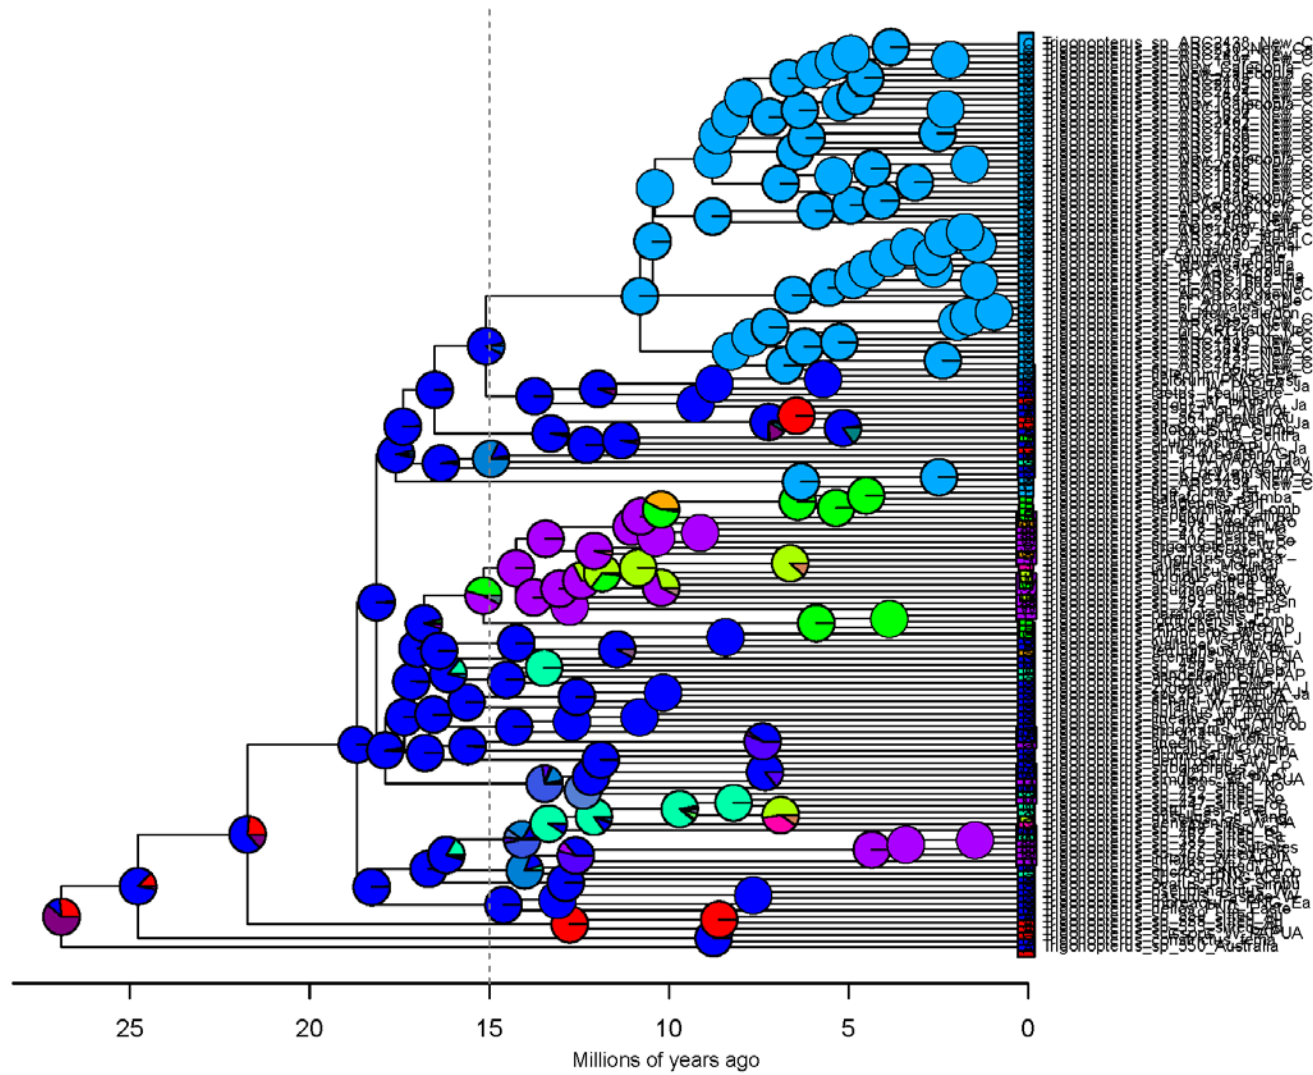

Supplement: rsos160546supp1.pdf [file rsos160546supp1.pdf]
